# Supplementary material for: Weakly supervised semantic segmentation for MRI: exploring the advantages and disadvantages of class activation maps for biological image segmentation with soft boundaries
Source: Springer Nature journal article supplement (doi:10.1038/s41598-023-29665-y), 2023-02-13
Supplement: 41598_2023_29665_MOESM1_ESM.pdf [file 41598_2023_29665_MOESM1_ESM.pdf]

## Supplementary Information

Weakly supervised semantic segmentation for MRI: Exploring the advantages and disadvantages of class activation maps for biological image segmentation with soft boundaries

Shaheen Syed<sup>1,2,\*</sup>, Kathryn E. Anderssen<sup>1</sup>, Svein Kristian Stormo<sup>1</sup>, and Mathias Kranz<sup>3,4</sup>

<sup>1</sup>Department of Seafood Industry, Nofima AS, P.O. Box 6122, Tromsø, 9291, Norway

<sup>2</sup>Department of Computer Science, The Arctic University of Norway, UiT, Hansine Hansens veg 18, Tromsø, 9009, Norway

<sup>3</sup>PET Imaging Center Tromsø, University Hospital North-Norway (UNN), Hansine Hansens veg 67, Tromsø, 9009, Norway

<sup>4</sup>Nuclear Medicine and Radiation Biology Research Group, The Arctic University of Norway, UiT, Hansine Hansens veg 18, Tromsø, 9009, Norway

\*corresponding author: shaheen.syed@uit.no

January 19, 2023

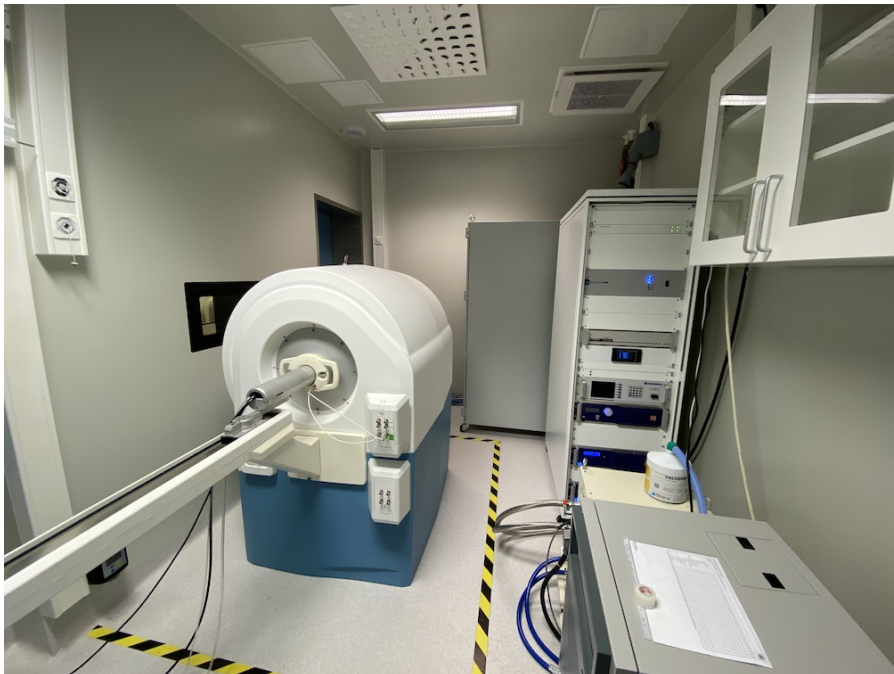

**Figure S1:** Preclinical 7 Tesla MR Scanner (MRS\*DRYMAG, MR solutions, Guildford, UK) used for MRI image acquisition.

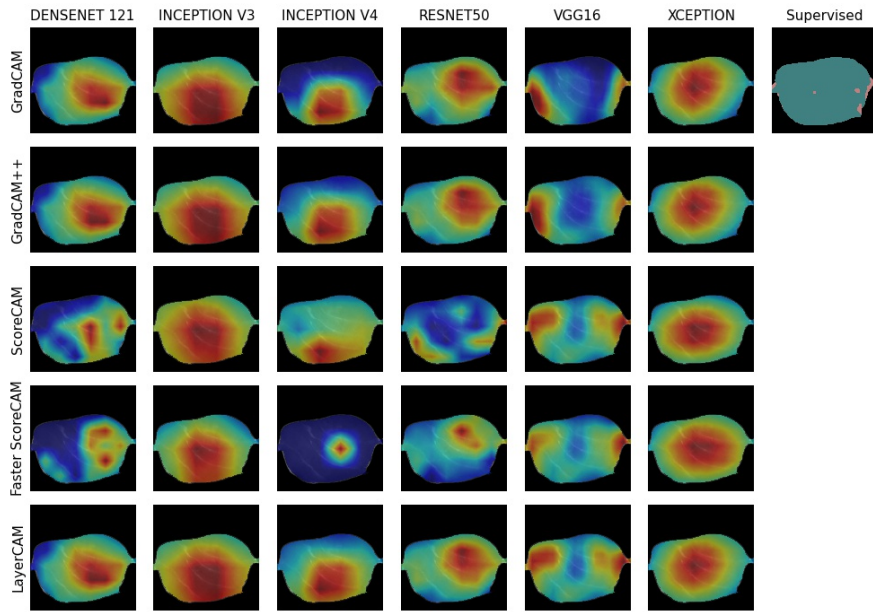

**Figure S2:** Overview of damaged tissue ( $y = 1$ ) of different CAM methods and CNN backbone combinations on the same sample. The plot on the top right shows the supervised classification in which the dark pink illustrates the damaged regions.

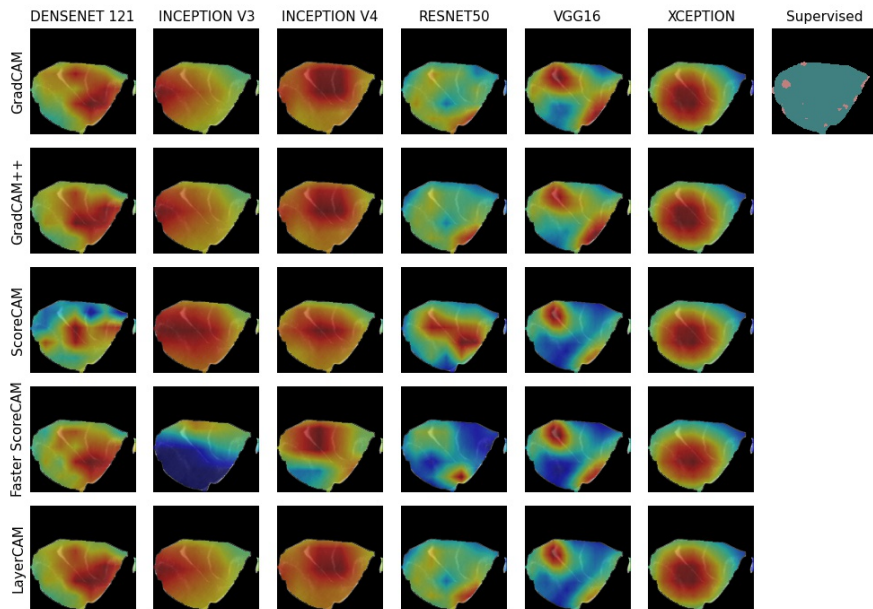

**Figure S3:** Overview of damaged tissue ( $y = 1$ ) of different CAM methods and CNN backbone combinations on the same sample. The plot on the top right shows the supervised classification in which the dark pink illustrates the damaged regions.

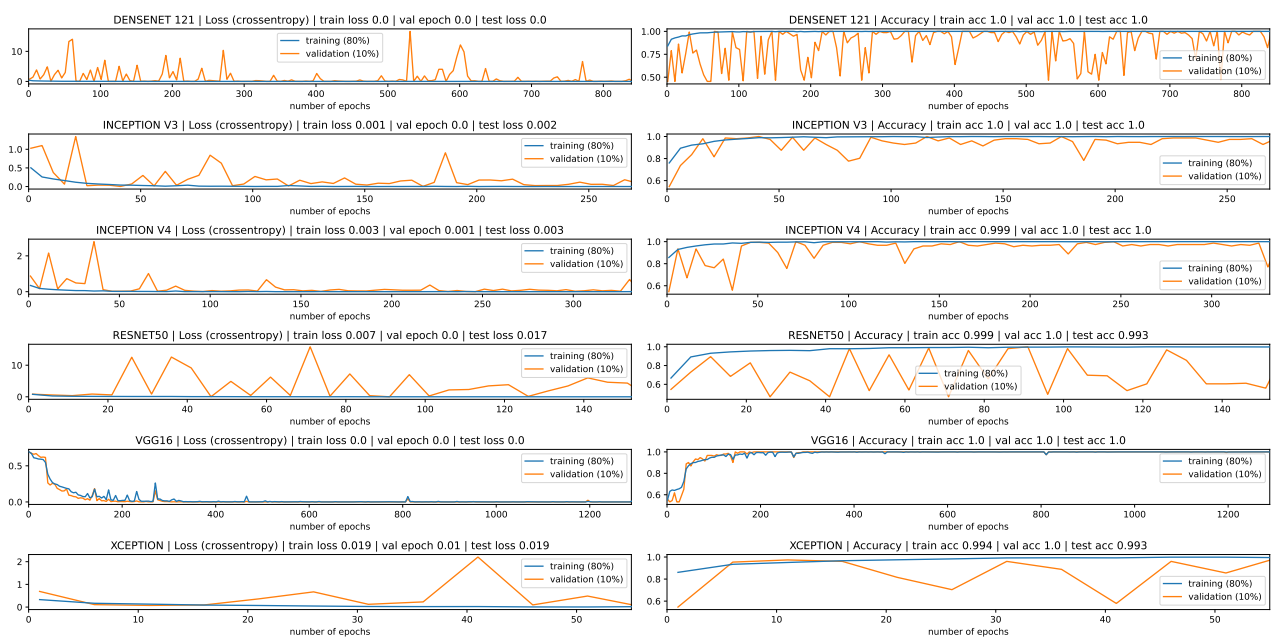

**Figure S4:** Accuracy and loss (columns) for each epoch (x-axis) and for each of the CNN backbones (rows). Training was done for a maximum of 2,500 epochs with early stopping enabled if the validation error did not increase for 200 epochs. We trained with stochastic gradient descent and a learning rate of  $5 \times 10^{-3}$ . All training was performed on a 3 x GPU RTX Titan with a Xeon W-2295 36-thread CPU on Ubuntu v.18.04 with TensorFlow 2.1. Batch size was 32.

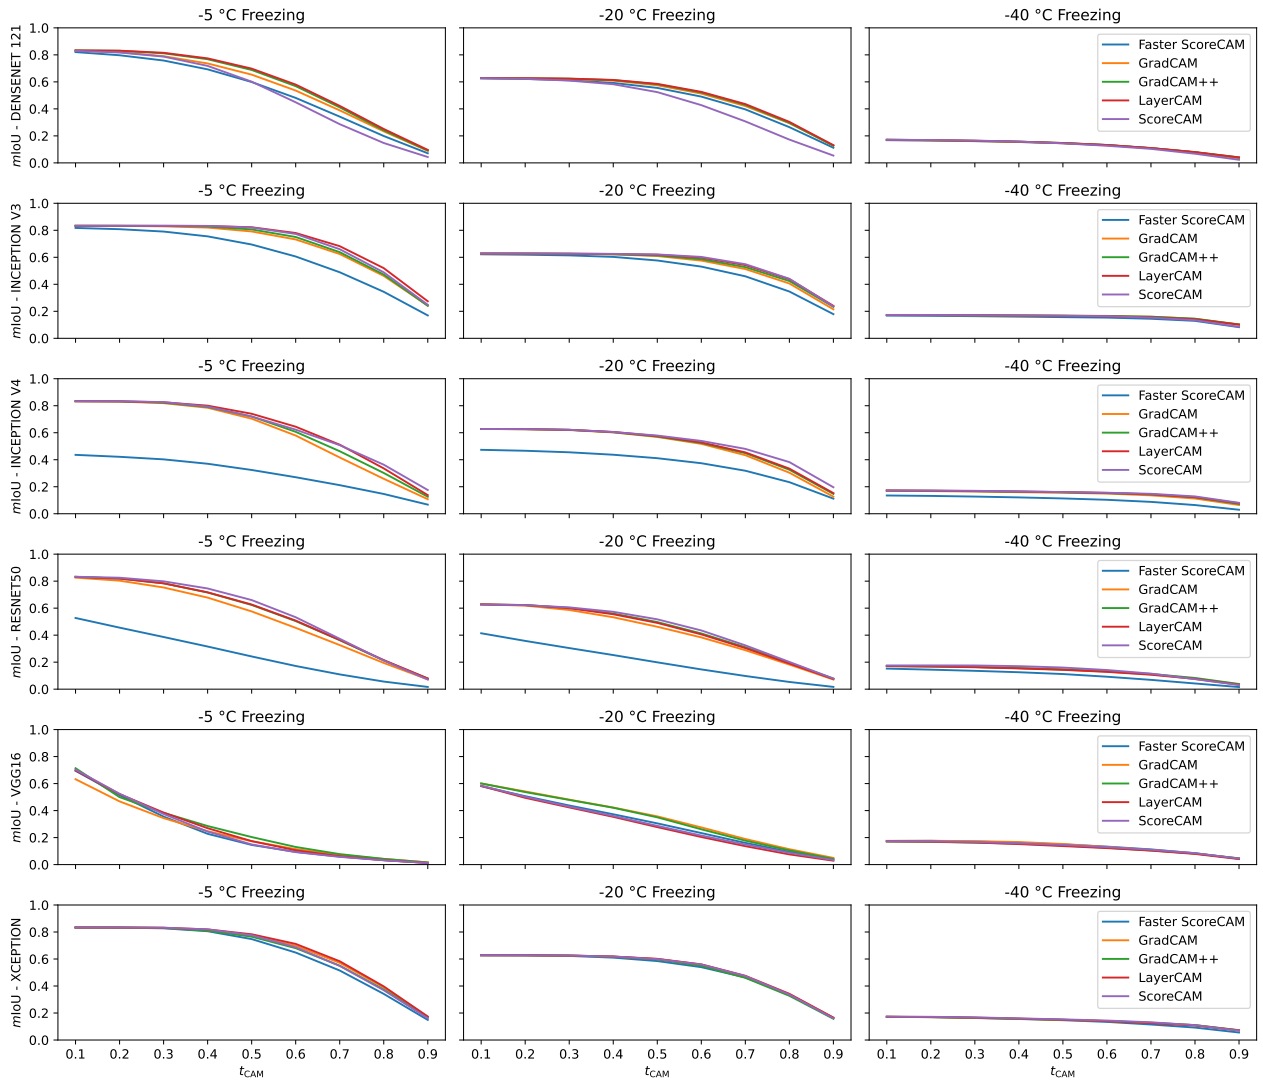

**Figure S5:** Mean intersection over union (mIoU) between CAM images and supervised classification separated by the three freezing protocols and for different threshold values ( $t_{CAM}$ ).

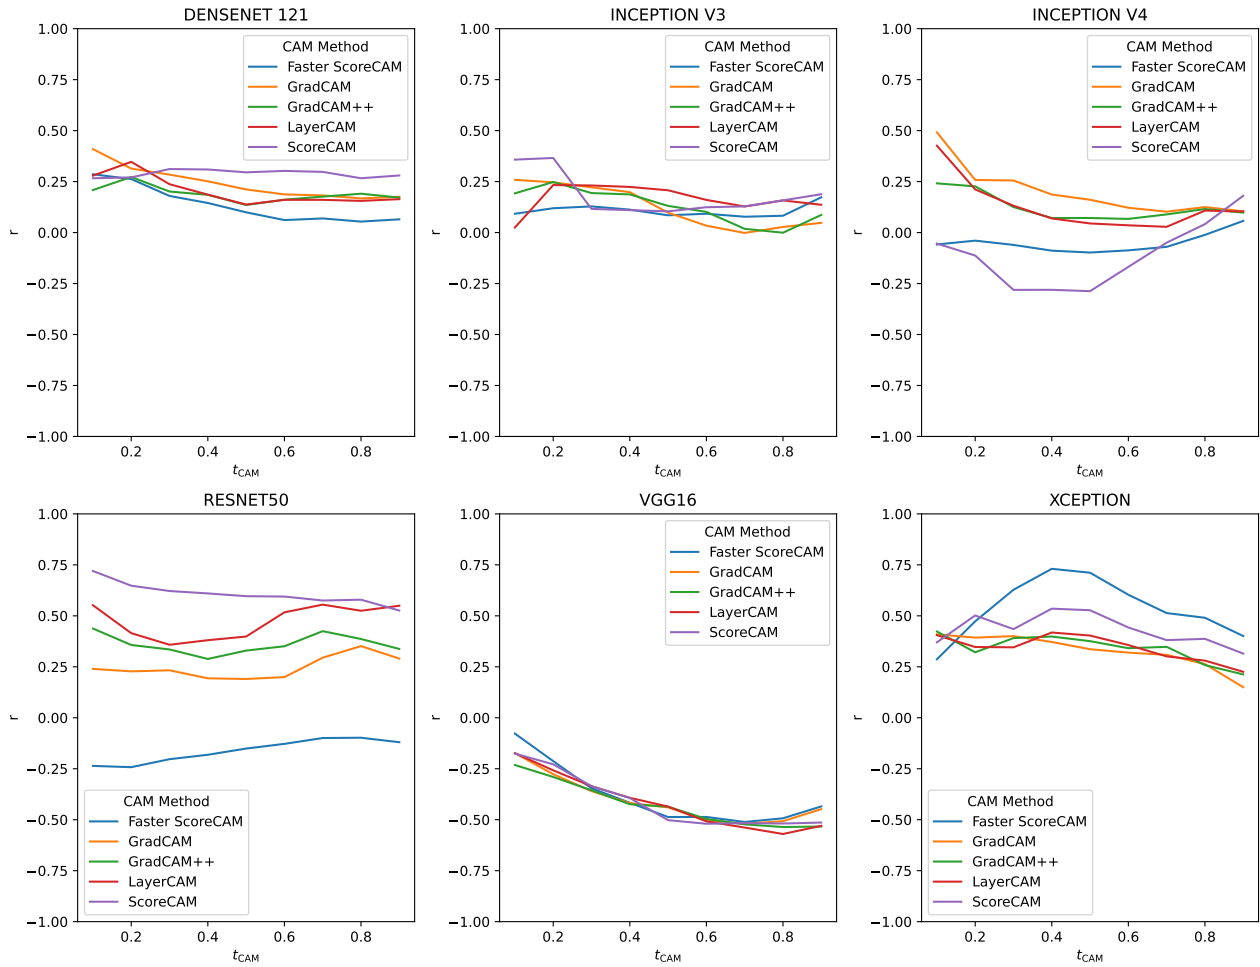

**Figure S6:** Spearman's rank ( $r$ ) correlation ( $y$ -axis) of damaged CAM regions ( $y = 1$ ) with the amount of liquid loss for each CNN model and for various  $t_{CAM}$  threshold values ( $x$ -axis).

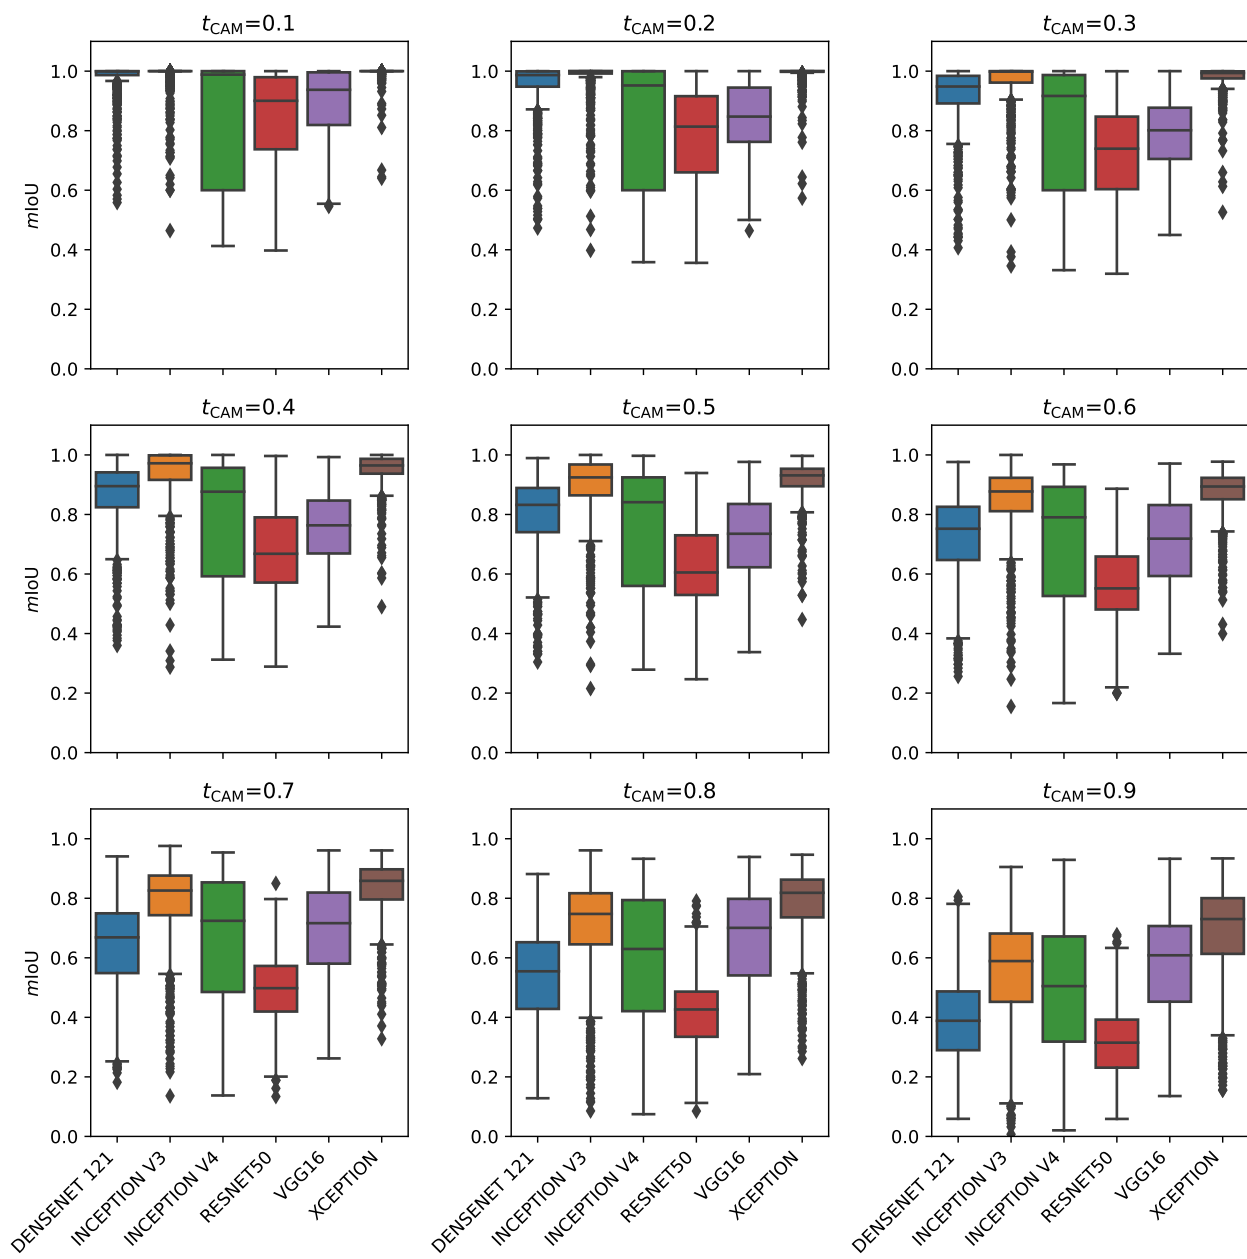

**Figure S7:** The IoU agreement across CAM methods and for different  $t_{CAM}$  threshold values. It reflects the degree to which CAM activations obtained from different CAM methods have a high IoU with each other while fixing the CNN model.

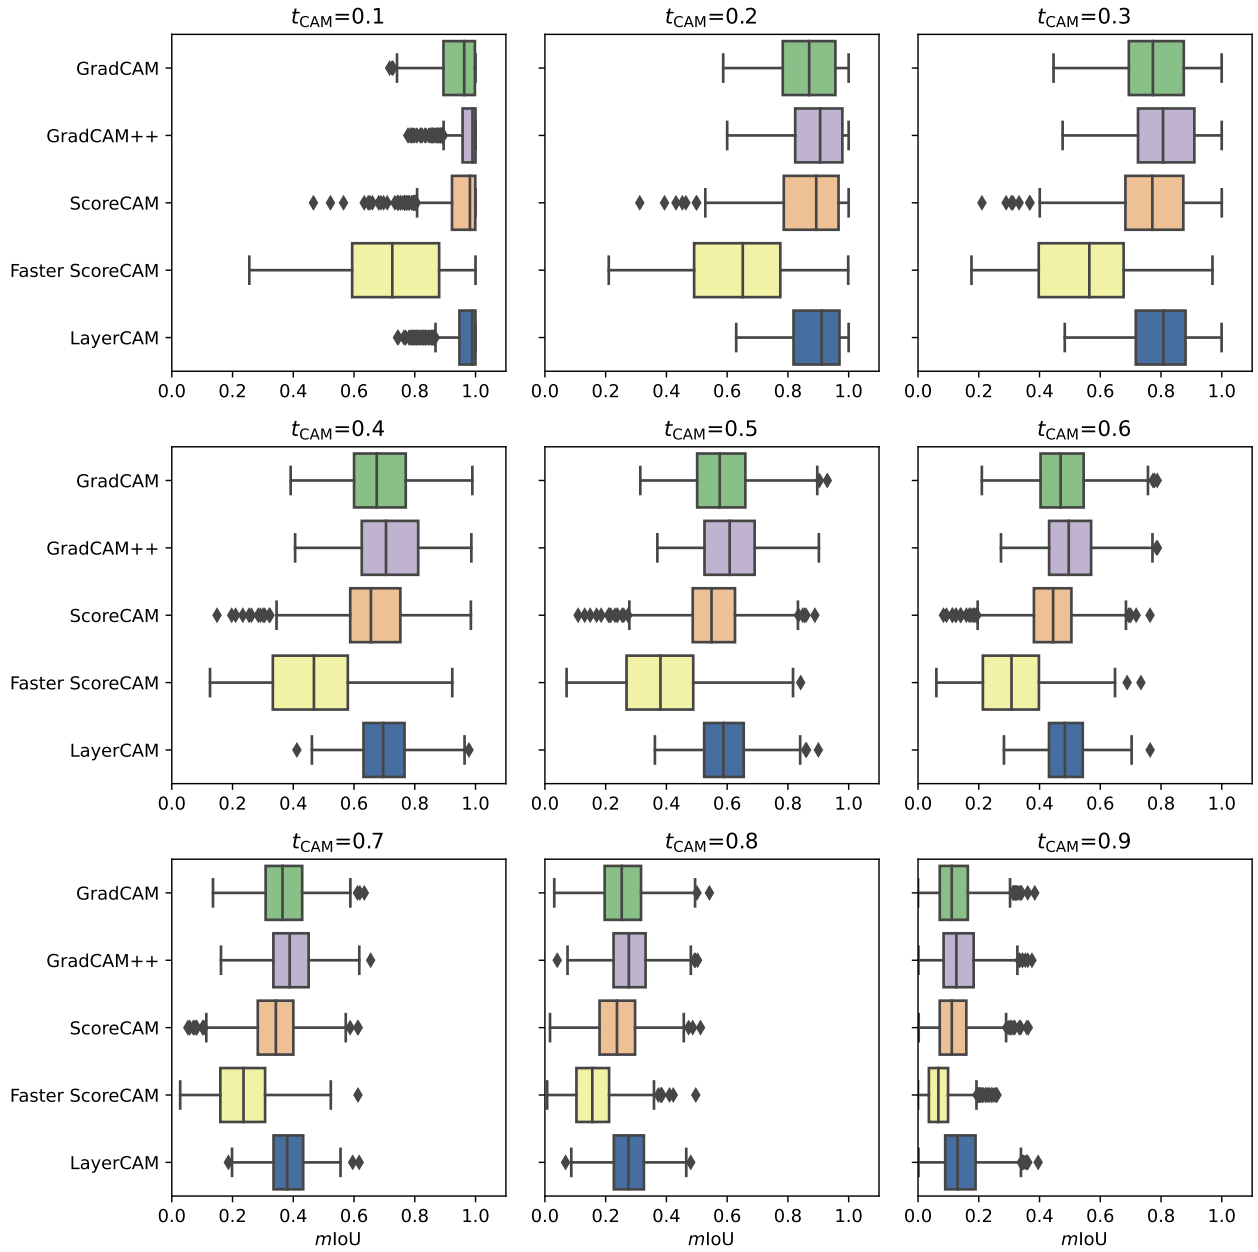

**Figure S8:** The IoU agreement across different CNN models and for different  $t_{CAM}$  threshold values while fixing the CAM method. This agreement is measured by calculating the average intersection over union between unique combinations of CNN models.
